# Supplementary material for: Regulation of plant immune receptor accumulation through translational repression by a glycine-tyrosine-phenylalanine (GYF) domain protein
Source: eLife journal article supplement (doi:10.7554/elife.23684), 2017-03-30
Supplement: supp [file elife-23684-supp-v1.zip]

Archive with 3 entries (3 files):
- elife_poa_e23684_Figure_9_figure_supplement_1.pdf
- elife_poa_e23684_Figure_9_figure_Supplement_2.pdf
- elife_poa_e23684_Supplementary_File_1.ai
