# Supplementary material for: Regulation of plant immune receptor accumulation through translational repression by a glycine-tyrosine-phenylalanine (GYF) domain protein
Source: eLife journal article supplement (doi:10.7554/elife.23684), 2017-03-30
Supplement: supp [file elife-23684-supp-v1.zip › elife_poa_e23684_Figure_9_figure_supplement_1.pdf]

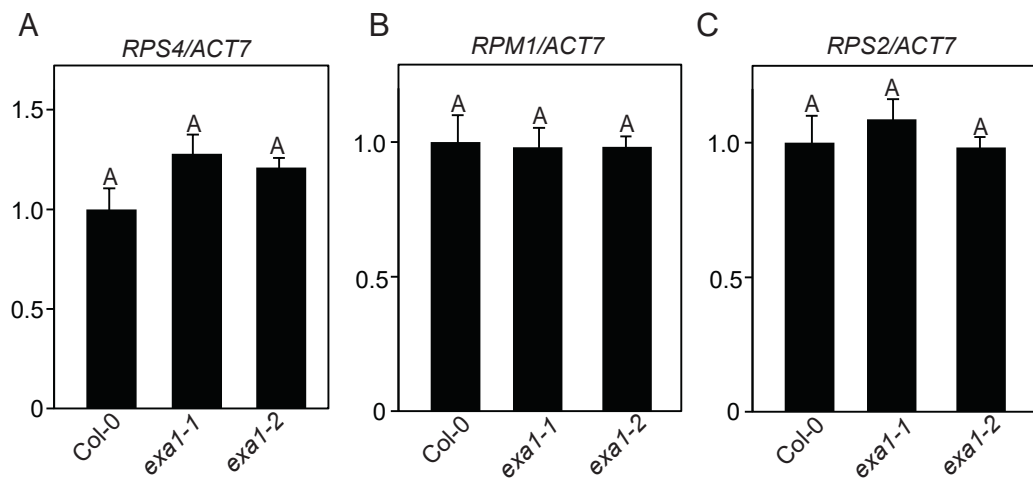

Figure 9 source data 1. EXA1 does not affect the transcript levels of *NLR* genes *RPS4*, *RPM1* and *RPS2*.

A-C. Transcript levels of *RPS4* (A), *RPM1* (B) and *RPS2* (C) in four-week-old soil-grown Col-0, *exa1-1* and *exa1-2* plants. *Actin7* was used to normalize the transcript levels. Two independent experiments were carried out with similar results. Bars represent means  $\pm$  SD (n=2). One-way ANOVA was used to calculate the statistical significance among genotypes, which is indicated by different letters ( $p < 0.01$ ).
