# Supplementary material for: Regulation of plant immune receptor accumulation through translational repression by a glycine-tyrosine-phenylalanine (GYF) domain protein
Source: eLife journal article supplement (doi:10.7554/elife.23684), 2017-03-30
Supplement: supp [file elife-23684-supp-v1.zip › elife_poa_e23684_Figure_9_figure_Supplement_2.pdf]

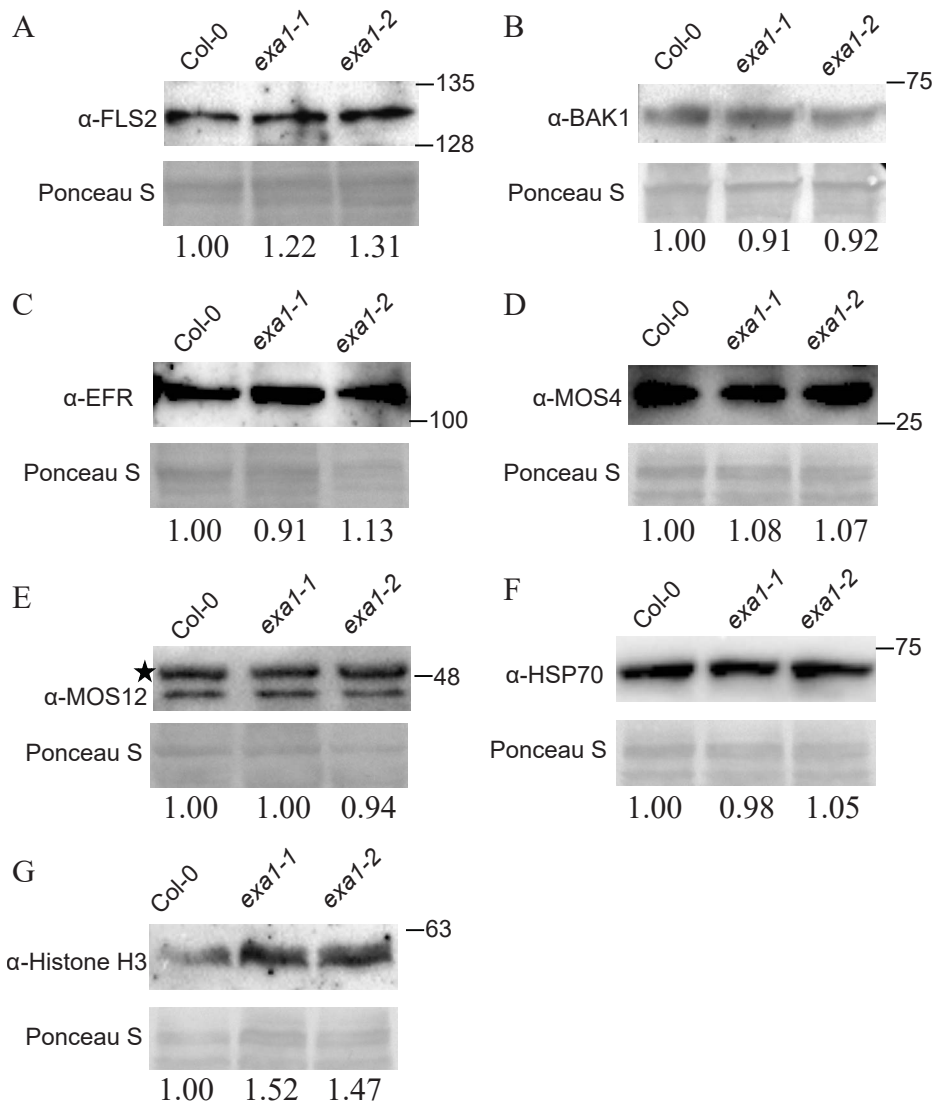

Figure 9 source data 2. Protein accumulation of non-NLR proteins in *exal* mutants.

Immunoblot analysis of protein levels of FLS2 (A), BAK1 (B), EFR (C), MOS4 (D), MOS 12 (E), HSP70 (F) and Histone H3 (G) in four-week-old soil-grown Col-0, *exal-1* and *exal-2* plants. Equal loading is shown by Ponceau S staining of a non-specific band. At least two independent experiments were carried out with similar results. Star indicates non-specific band. The relative band intensity is shown below (normalized to loading control, relative to Col-0). Molecular mass markers in kilodaltons are indicated on the right.
